# Supplementary material
Source: MDPI journal article supplement (https://www.mdpi.com/2073-4395/13/1/186)
Supplement: s1 [file s1]

## Residue Analysis and Dietary Risk Assessment of Metalaxyl in Chinese Bayberry and *Dendrobium officinale*

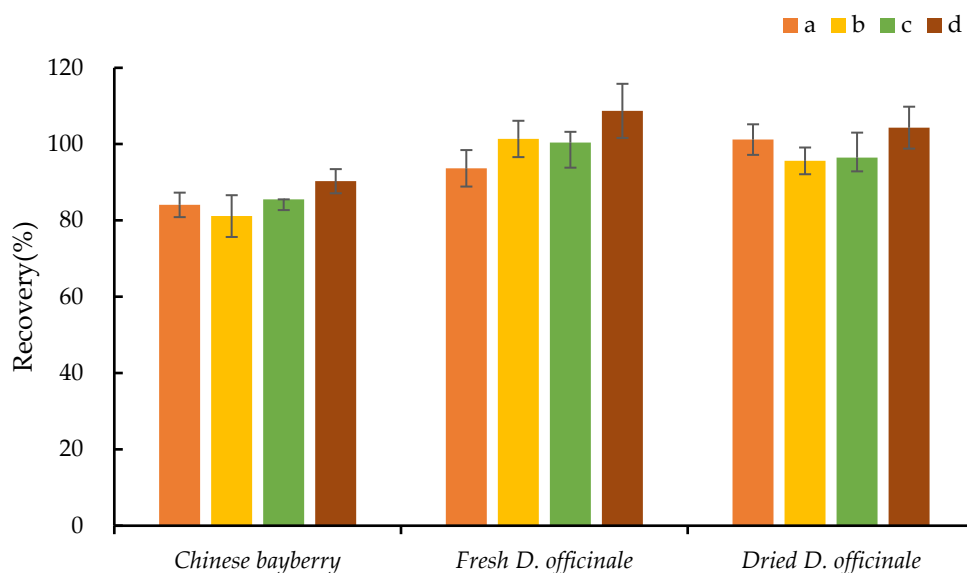

**Figure S1.** Recovery of metalaxyl in Chinese bayberry, fresh *D. officinale* and dried *D. officinale* samples for the method using different combinations of cleanert (a) 50 mg PSA + 150 mg MgSO<sub>4</sub>; (b) 50 mg C18 + 150 mg MgSO<sub>4</sub>; (c) 50 mg PSA + 50 mg C18 + 150 mg MgSO<sub>4</sub>; (d) 50 mg PSA + 50 mg C18 + 8 mg GCB + 150 mg MgSO<sub>4</sub>.

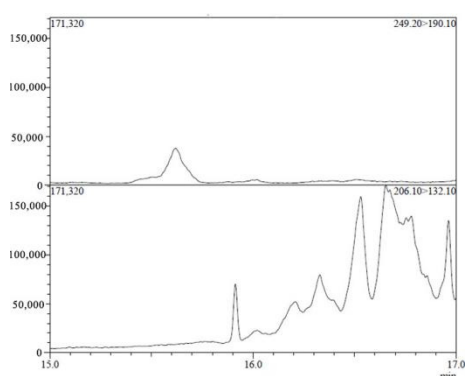

(2a)

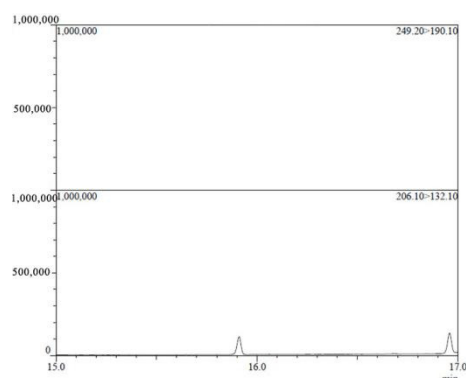

(2b)

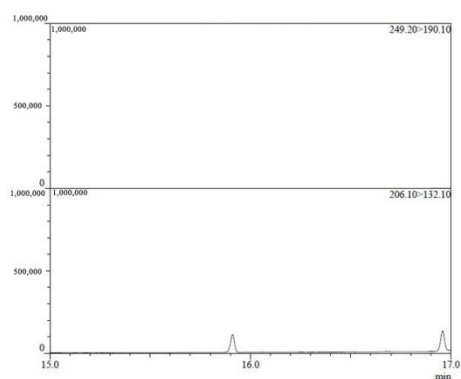

(2c)

**Figure S2.** Chromatogram of (2a)Chinese bayberry, (2b)fresh *D. officinale* and (2c)dried *D. officinale* blank samples.

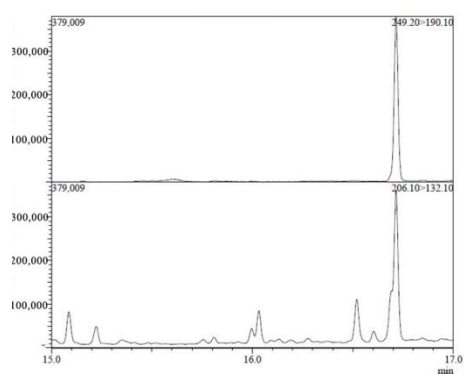

(3a)

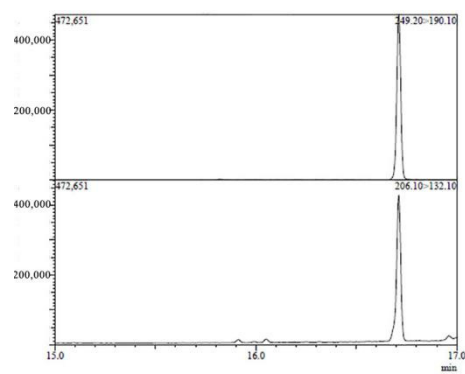

(3b)

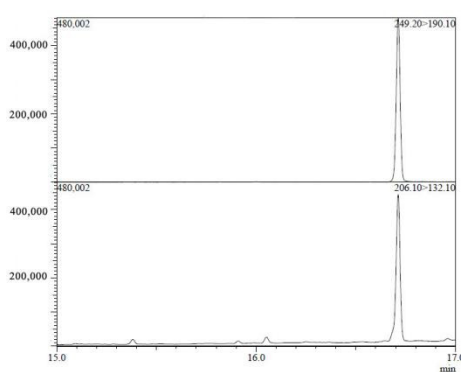

(3c)

**Figure S3.** Chromatogram of analytical standards of metalaxyl 0.05 mg L<sup>-1</sup> in (3a) Chinese bayberry, (3b) fresh *D. officinale* and (3c) dried *D. officinale* matrix.

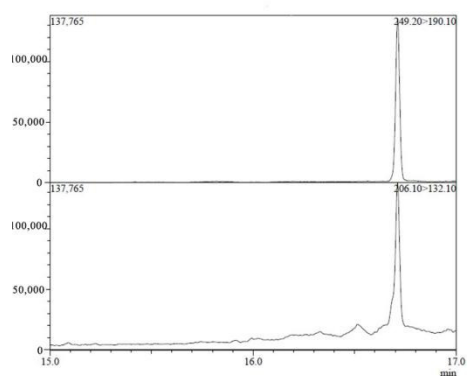

(4a)

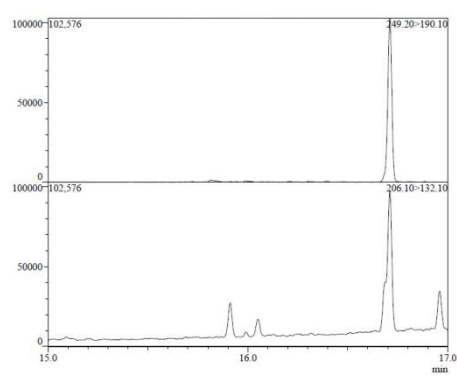

(4b)

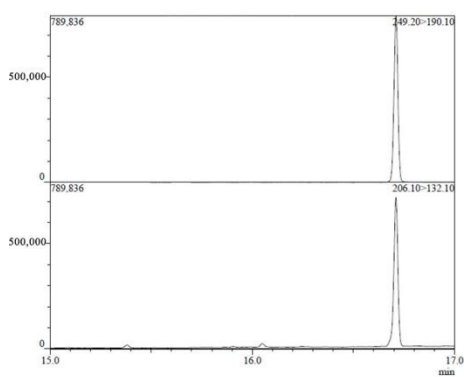

(4c)

**Figure S4.** Chromatogram of metalaxyl in (4a) Chinese bayberry, (4b) fresh *D. officinale* and (4c) dried *D. officinale* real samples.
